# Supplementary material for: Three Autophagy-Related lncRNA are Prognostic Biomarkers for Patients with Head and Neck Squamous Cell Carcinoma
Source: Research Square preprint supplement (doi:10.21203/rs.3.rs-892575/v1), 2021-09-20
Supplement: Supplementary file 1 [file 41c49f5d961bdbb66dbee827.docx]

TableS4. Univariate Cox results of 3 lncRNAs based on training cohort.

| lncRNA | HR | HR.95L | HR.95H | pvalue |
| --- | --- | --- | --- | --- |
| TMEM44-AS1 | 1.116161 | 1.039836 | 1.198087 | 0.002359 |
| AC245041.2 | 1.07761 | 1.024675 | 1.133279 | 0.003632 |
| AC002401.4 | 1.081241 | 1.024088 | 1.141583 | 0.004817 |
